# Supplementary material for: Exome Sequencing Reveals a Putative Role for HLA-C*03:02 in Control of HIV-1 in African Pediatric Populations
Source: Front Genet. 2021 Aug 26;12:720213. doi: 10.3389/fgene.2021.720213 (PMC8428176; doi:10.3389/fgene.2021.720213)
Supplement: Supplementary file 5 [file Table_4.XLSX]

## Sheet: Table S4
TABLE S4. Class I HLA allele count and frequency among pediatric HIV populations in Uganda and Botswana (N=814)
HLA Locus		Uganda		Botswana		Overall
		Allele count	Allele frequency	Allele count	Allele frequency	Allele count	Allele frequency
HLA-A	A*01:01	28	0.0405	14	0.0164	42	0.0272
	A*01:02	4	0.0058	0	0	4	0.0026
	A*01:03	1	0.0014	5	0.0059	6	0.0039
	A*01:09	2	0.0029	0	0	2	0.0013
	A*01:23	0	0	1	0.0012	1	0.0006
	A*02:01	75	0.1084	50	0.0587	125	0.081
	A*02:02	23	0.0332	15	0.0176	38	0.0246
	A*02:05	15	0.0217	46	0.054	61	0.0395
	A*02:10	2	0.0029	0	0	2	0.0013
	A*02:11	2	0.0029	1	0.0012	3	0.0019
	A*02:12	0	0	1	0.0012	1	0.0006
	A*02:13	1	0.0014	2	0.0023	3	0.0019
	A*02:14	4	0.0058	3	0.0035	7	0.0045
	A*02:22	1	0.0014	0	0	1	0.0006
	A*02:23	0	0	1	0.0012	1	0.0006
	A*03:01	41	0.0592	36	0.0423	77	0.0499
	A*03:08	2	0.0029	0	0	2	0.0013
	A*03:12	1	0.0014	0	0	1	0.0006
	A*03:24	0	0	1	0.0012	1	0.0006
	A*03:72	0	0	1	0.0012	1	0.0006
	A*03:81	1	0.0014	0	0	1	0.0006
	A*03:89	1	0.0014	0	0	1	0.0006
	A*11:01	0	0	4	0.0047	4	0.0026
	A*23:01	49	0.0708	100	0.1174	149	0.0965
	A*23:04	2	0.0029	2	0.0023	4	0.0026
	A*23:19	0	0	1	0.0012	1	0.0006
	A*24:02	9	0.013	3	0.0035	12	0.0078
	A*24:10	0	0	1	0.0012	1	0.0006
	A*26:01	0	0	16	0.0188	16	0.0104
	A*26:12	8	0.0116	0	0	8	0.0052
	A*29:01	5	0.0072	3	0.0035	8	0.0052
	A*29:02	45	0.065	46	0.054	91	0.0589
	A*29:03	1	0.0014	1	0.0012	2	0.0013
	A*29:05	2	0.0029	1	0.0012	3	0.0019
	A*29:11	0	0	2	0.0023	2	0.0013
	A*29:13	0	0	3	0.0035	3	0.0019
	A*30:01	58	0.0838	107	0.1256	165	0.1069
	A*30:02	71	0.1026	67	0.0786	138	0.0894
	A*30:04	7	0.0101	10	0.0117	17	0.011
	A*30:09	2	0.0029	1	0.0012	3	0.0019
	A*30:11	2	0.0029	0	0	2	0.0013
	A*31:01	3	0.0043	0	0	3	0.0019
	A*31:04	7	0.0101	0	0	7	0.0045
	A*31:36	0	0	1	0.0012	1	0.0006
	A*32:01	7	0.0101	26	0.0305	33	0.0214
	A*33:01	5	0.0072	16	0.0188	21	0.0136
	A*33:03	7	0.0101	12	0.0141	19	0.0123
	A*33:10	2	0.0029	0	0	2	0.0013
	A*33:59	0	0	1	0.0012	1	0.0006
	A*34:02	17	0.0246	52	0.061	69	0.0447
	A*34:08	1	0.0014	1	0.0012	2	0.0013
	A*34:09	0	0	1	0.0012	1	0.0006
	A*36:01	17	0.0246	20	0.0235	37	0.024
	A*43:01	0	0	30	0.0352	30	0.0194
	A*66:01	24	0.0347	16	0.0188	40	0.0259
	A*66:02	5	0.0072	0	0	5	0.0032
	A*66:03	0	0	2	0.0023	2	0.0013
	A*68:01	8	0.0116	26	0.0305	34	0.022
	A*68:02	60	0.0867	56	0.0657	116	0.0751
	A*68:09	0	0	1	0.0012	1	0.0006
	A*68:27	0	0	3	0.0035	3	0.0019
	A*68:45	0	0	1	0.0012	1	0.0006
	A*68:60	1	0.0014	0	0	1	0.0006
	A*68:71	0	0	2	0.0023	2	0.0013
	A*74:01	54	0.078	32	0.0376	86	0.0557
	A*74:03	6	0.0087	0	0	6	0.0039
	A*74:13	2	0.0029	0	0	2	0.0013
	A*80:01	1	0.0014	8	0.0094	9	0.0058
HLA-B	B*07:02	26	0.0385	29	0.0349	55	0.0365
	B*07:05	1	0.0015	7	0.0084	8	0.0053
	B*07:14	0	0	1	0.0012	1	0.0007
	B*07:16	0	0	1	0.0012	1	0.0007
	B*07:50	1	0.0015	0	0	1	0.0007
	B*07:60	0	0	1	0.0012	1	0.0007
	B*08:01	16	0.0237	35	0.0422	51	0.0339
	B*13:02	4	0.0059	9	0.0108	13	0.0086
	B*13:03	1	0.0015	0	0	1	0.0007
	B*14:01	3	0.0044	22	0.0265	25	0.0166
	B*14:02	18	0.0266	9	0.0108	27	0.0179
	B*14:03	1	0.0015	1	0.0012	2	0.0013
	B*14:11	1	0.0015	0	0	1	0.0007
	B*14:19	1	0.0015	0	0	1	0.0007
	B*15:01	0	0	5	0.006	5	0.0033
	B*15:03	62	0.0917	62	0.0747	124	0.0823
	B*15:05	0	0	1	0.0012	1	0.0007
	B*15:10	32	0.0473	54	0.0651	86	0.0571
	B*15:12	0	0	1	0.0012	1	0.0007
	B*15:15	0	0	1	0.0012	1	0.0007
	B*15:16	4	0.0059	8	0.0096	12	0.008
	B*15:17	3	0.0044	5	0.006	8	0.0053
	B*15:31	2	0.003	0	0	2	0.0013
	B*15:37	4	0.0059	1	0.0012	5	0.0033
	B*15:47	0	0	1	0.0012	1	0.0007
	B*15:62	0	0	1	0.0012	1	0.0007
	B*15:64	1	0.0015	0	0	1	0.0007
	B*15:83	0	0	1	0.0012	1	0.0007
	B*18:01	36	0.0533	27	0.0325	63	0.0418
	B*18:03	5	0.0074	0	0	5	0.0033
	B*18:58	1	0.0015	1	0.0012	2	0.0013
	B*18:65	0	0	1	0.0012	1	0.0007
	B*27:03	1	0.0015	0	0	1	0.0007
	B*27:05	1	0.0015	1	0.0012	2	0.0013
	B*35:01	17	0.0251	10	0.012	27	0.0179
	B*35:02	1	0.0015	0	0	1	0.0007
	B*35:15	1	0.0015	0	0	1	0.0007
	B*35:19	0	0	1	0.0012	1	0.0007
	B*35:20	1	0.0015	0	0	1	0.0007
	B*35:32	0	0	1	0.0012	1	0.0007
	B*35:63	0	0	1	0.0012	1	0.0007
	B*35:71	1	0.0015	1	0.0012	2	0.0013
	B*37:01	2	0.003	0	0	2	0.0013
	B*38:01	0	0	1	0.0012	1	0.0007
	B*39:01	1	0.0015	0	0	1	0.0007
	B*39:10	11	0.0163	6	0.0072	17	0.0113
	B*39:24	2	0.003	0	0	2	0.0013
	B*39:43	0	0	1	0.0012	1	0.0007
	B*40:16	2	0.003	3	0.0036	5	0.0033
	B*40:32	0	0	1	0.0012	1	0.0007
	B*40:80	0	0	1	0.0012	1	0.0007
	B*41:01	13	0.0192	13	0.0157	26	0.0173
	B*41:02	3	0.0044	2	0.0024	5	0.0033
	B*42:01	54	0.0799	112	0.1349	166	0.1102
	B*42:02	5	0.0074	12	0.0145	17	0.0113
	B*44:02	0	0	1	0.0012	1	0.0007
	B*44:03	16	0.0237	76	0.0916	92	0.0611
	B*44:15	7	0.0104	0	0	7	0.0046
	B*44:18	2	0.003	0	0	2	0.0013
	B*44:37	4	0.0059	5	0.006	9	0.006
	B*44:50	1	0.0015	0	0	1	0.0007
	B*45:01	42	0.0621	63	0.0759	105	0.0697
	B*47:01	1	0.0015	2	0.0024	3	0.002
	B*47:02	2	0.003	1	0.0012	3	0.002
	B*47:03	11	0.0163	0	0	11	0.0073
	B*49:01	21	0.0311	4	0.0048	25	0.0166
	B*49:09	1	0.0015	0	0	1	0.0007
	B*49:10	1	0.0015	0	0	1	0.0007
	B*49:11	2	0.003	0	0	2	0.0013
	B*50:01	3	0.0044	0	0	3	0.002
	B*51:01	8	0.0118	5	0.006	13	0.0086
	B*51:02	1	0.0015	0	0	1	0.0007
	B*51:14	1	0.0015	0	0	1	0.0007
	B*52:01	1	0.0015	0	0	1	0.0007
	B*53:01	55	0.0814	47	0.0566	102	0.0677
	B*53:08	2	0.003	0	0	2	0.0013
	B*53:22	0	0	1	0.0012	1	0.0007
	B*57:01	0	0	1	0.0012	1	0.0007
	B*57:02	11	0.0163	1	0.0012	12	0.008
	B*57:03	20	0.0296	18	0.0217	38	0.0252
	B*58:01	26	0.0385	52	0.0627	78	0.0518
	B*58:02	57	0.0843	64	0.0771	121	0.0803
	B*58:07	3	0.0044	7	0.0084	10	0.0066
	B*58:25	1	0.0015	0	0	1	0.0007
	B*73:01	0	0	2	0.0024	2	0.0013
	B*81:01	31	0.0459	28	0.0337	59	0.0392
	B*82:02	6	0.0089	0	0	6	0.004
HLA-C	C*02:02	4	0.006	13	0.0154	17	0.0112
	C*02:05	2	0.003	2	0.0024	4	0.0026
	C*02:10	45	0.067	68	0.0808	113	0.0746
	C*02:14	1	0.0015	1	0.0012	2	0.0013
	C*02:17	0	0	1	0.0012	1	0.0007
	C*02:26	0	0	1	0.0012	1	0.0007
	C*02:27	5	0.0074	8	0.0095	13	0.0086
	C*03:02	15	0.0223	11	0.0131	26	0.0172
	C*03:03	5	0.0074	3	0.0036	8	0.0053
	C*03:04	38	0.0565	18	0.0214	56	0.037
	C*03:07	1	0.0015	0	0	1	0.0007
	C*03:13	1	0.0015	0	0	1	0.0007
	C*03:18	0	0	1	0.0012	1	0.0007
	C*03:39	1	0.0015	0	0	1	0.0007
	C*03:71	1	0.0015	0	0	1	0.0007
	C*04:01	94	0.1399	147	0.1746	241	0.1592
	C*04:07	9	0.0134	0	0	9	0.0059
	C*04:10	1	0.0015	0	0	1	0.0007
	C*04:12	1	0.0015	1	0.0012	2	0.0013
	C*04:32	0	0	1	0.0012	1	0.0007
	C*04:33	1	0.0015	4	0.0048	5	0.0033
	C*05:01	3	0.0045	8	0.0095	11	0.0073
	C*06:02	89	0.1324	100	0.1188	189	0.1248
	C*06:06	0	0	1	0.0012	1	0.0007
	C*06:11	2	0.003	0	0	2	0.0013
	C*06:17	2	0.003	0	0	2	0.0013
	C*06:30	7	0.0104	6	0.0071	13	0.0086
	C*06:62	0	0	1	0.0012	1	0.0007
	C*06:89	4	0.006	10	0.0119	14	0.0092
	C*07:01	77	0.1146	95	0.1128	172	0.1136
	C*07:02	22	0.0327	25	0.0297	47	0.031
	C*07:04	28	0.0417	15	0.0178	43	0.0284
	C*07:05	1	0.0015	0	0	1	0.0007
	C*07:14	1	0.0015	0	0	1	0.0007
	C*07:19	2	0.003	3	0.0036	5	0.0033
	C*07:27	4	0.006	2	0.0024	6	0.004
	C*07:31	1	0.0015	0	0	1	0.0007
	C*07:96	1	0.0015	0	0	1	0.0007
	C*08:02	27	0.0402	18	0.0214	45	0.0297
	C*08:04	9	0.0134	27	0.0321	36	0.0238
	C*08:15	0	0	1	0.0012	1	0.0007
	C*08:33	1	0.0015	0	0	1	0.0007
	C*12:02	2	0.003	0	0	2	0.0013
	C*12:03	6	0.0089	2	0.0024	8	0.0053
	C*12:05	1	0.0015	0	0	1	0.0007
	C*12:33	0	0	3	0.0036	3	0.002
	C*14:02	3	0.0045	4	0.0048	7	0.0046
	C*14:03	0	0	2	0.0024	2	0.0013
	C*14:12	1	0.0015	2	0.0024	3	0.002
	C*15:05	4	0.006	7	0.0083	11	0.0073
	C*15:25	0	0	2	0.0024	2	0.0013
	C*16:01	37	0.0551	57	0.0677	94	0.0621
	C*16:02	1	0.0015	4	0.0048	5	0.0033
	C*16:06	1	0.0015	0	0	1	0.0007
	C*16:07	2	0.003	2	0.0024	4	0.0026
	C*16:20	1	0.0015	0	0	1	0.0007
	C*16:21	0	0	1	0.0012	1	0.0007
	C*16:25	0	0	1	0.0012	1	0.0007
	C*16:34	1	0.0015	0	0	1	0.0007
	C*17:01	65	0.0967	123	0.1461	188	0.1242
	C*17:10	0	0	1	0.0012	1	0.0007
	C*17:11	7	0.0104	11	0.0131	18	0.0119
	C*18:01	34	0.0506	28	0.0333	62	0.041
