# Supplementary material for: Exome Sequencing Reveals a Putative Role for HLA-C*03:02 in Control of HIV-1 in African Pediatric Populations
Source: Front Genet. 2021 Aug 26;12:720213. doi: 10.3389/fgene.2021.720213 (PMC8428176; doi:10.3389/fgene.2021.720213)
Supplement: Supplementary file 6 [file Table_5.XLSX]

## Sheet: Table S5
		Table S5 HLA allele frequencies in different populations
		Population		Allele Frequencies
				A*30:01		B*15:10	B*42:01	B*57:03	B*58:01		C*03:02	C*04:01	C*06:02	C*07:01	C*17:01
		HIV Infected
			Overall CAfGEN	0.1069		0.0571	0.1102	0.0252	0.0518		0.0172	0.1592	0.1248	0.1136	0.1242
			Ugandan CAfGEN	0.0838		0.0473	0.0799	0.0296	0.0385		0.0223	0.1399	0.1324	0.1146	0.0967
			Botswana CAfGEN	0.1256		0.0651	0.1349	0.0217	0.0627		0.0131	0.1746	0.1188	0.1128	0.1461
		Healthy populations
			Ugandans	0.0307		0.025	0.0124	0.012	0.04		0.018	0.1411	0.1166	0.1595	0.0276
			Kenyan Nandi	0.0477		0.017	0.0688	0.029	0.1		0.046	0.1146	0.2167	0.1521	0.1021
			Kenyan Luo	0.0642		0.036	0.0774	0.009	0.07		0.032	0.1321	0.1868	0.117	0.0868
			Zimbabwe Shona	0.091		0.084	0.069	0.044	0.044		0.011	0.148	0.128	0.106	0.082
			South African Blacks	0.1021		0.0775	0.0739	0.0247	0.0704		0.0106	0.1409	0.169	0.0563	0.1056
			African Americans	0.0691		0.0303	0.0546	0.0338	0.0351		0.0137	0.1846	0.0886	0.124	0.0736
		Data was extracted from Cao et al., Tshabalala et al., Kijak et al., and IMGT/HLA database
