# Supplementary material for: Exome Sequencing Reveals a Putative Role for HLA-C*03:02 in Control of HIV-1 in African Pediatric Populations
Source: Front Genet. 2021 Aug 26;12:720213. doi: 10.3389/fgene.2021.720213 (PMC8428176; doi:10.3389/fgene.2021.720213)
Supplement: Supplementary file 7 [file Table_6.XLSX]

## Sheet: Table S6 
	Table S6 Differences in HLA alleles found in pediatric HIV popiulations in Uganda and Botswana
	HLA Allele		Allele frequency			OR (95% CI)	P value†
			Uganda	Botswana	Total
			(n = 370)	(n = 451)
	HLA A
		A*02:01	0.1084	0.0587	0.081	1.94 (1.34–2.8)	0.005
		A*74:01	0.078	0.0376	0.0557	2.16 (1.38–3.39)	0.005
		A*34:02	0.0246	0.061	0.0447	0.38 (0.2–0.67)	0.005
		A*02:05	0.0217	0.054	0.0395	0.38 (0.21–0.70)	0.008
		A*23:01	0.0708	0.1174	0.0965	0.57 (0.40–0.81)	0.010
		A*01:01	0.0405	0.0164	0.0272	2.52 (1.31–4.8)	0.020
		A*32:01	0.0101	0.0305	0.0214	0.32 (0.14–0.75)	0.024
		A*30:01	0.0838	0.1256	0.1069	0.6 (0.45–0.89)	0.024
		A*68:01	0.0116	0.0305	0.022	0.37 (0.16–0.8)	0.039
	HLA B
		B*44:03	0.0237	0.0916	0.0611	0.24 (0.13–0.41)	1.63 X 10-4
		B*49:01	0.0311	0.0048	0.0166	6.62 (2.26–19.38)	0.001
		B*42:01	0.0799	0.1349	0.1102	0.55 (0.39–0.78)	0.006
		B*14:01	0.0044	0.0265	0.0166	0.16 (0.04–0.54)	0.008
	HLA C
		C*03:04	0.0565	0.0214	0.037	2.74 (1.55–4.85)	0.007
		C*17:01	0.0967	0.1461	0.1242	0.6 (0.45–0.86)	0.036
		C*07:04	0.0417	0.0178	0.0284	2.39 (1.26–4.52)	0.04
	† FDR adjusted P value
	n, number of participants
