# Supplementary material for: Exome Sequencing Reveals a Putative Role for HLA-C*03:02 in Control of HIV-1 in African Pediatric Populations
Source: Front Genet. 2021 Aug 26;12:720213. doi: 10.3389/fgene.2021.720213 (PMC8428176; doi:10.3389/fgene.2021.720213)
Supplement: Supplementary file 8 [file Table_7.XLSX]

## Sheet: Table S7
	Table S7 Global pairwise linkage disequilibrium
	HLA loci		Wn	D'	ln(L_1)	ln(L_0)	p-value
	Uganda
		A:B	0.45271	0.65307	-3053.95	-3716.03	-
		A:C	0.30553	0.59446	-2918.19	-3379.71	-
		B:C	0.54272	0.87593	-2406.65	-3530.9	-
	Botswana
		A:B	0.42587	0.64506	-3612.17	-4401.32	-
		A:C	0.38323	0.60042	-3584.52	-4231.64	-
		B:C	0.59406	0.86833	-2879.95	-4158.78	-
	Wn Cramer’s V Statistic, D' Hedrick's statistic, In(L_1) log-likelihood of obtaining the observed data given the inferred haplotype
	* p < 0.05 is indicative of overall significant LD
