# Supplementary material for: Exome Sequencing Reveals a Putative Role for HLA-C*03:02 in Control of HIV-1 in African Pediatric Populations
Source: Front Genet. 2021 Aug 26;12:720213. doi: 10.3389/fgene.2021.720213 (PMC8428176; doi:10.3389/fgene.2021.720213)
Supplement: Supplementary file 9 [file Table_8.XLSX]

## Sheet: Table S8
	Table S8. The distribution HLA haplotypes in Uganda and Botswana
	Haplotype	Overall	Botswana	Uganda		Haplotype	Overall	Botswana	Uganda		Haplotype	Overall	Botswana	Uganda		Haplotype	Overall	Botswa	Uganda
	A*30:01~B*42:01	0.05254	0.07157	0.02747		A*30:01~C*17:01	0.05657	0.07579	0.03495		B*4201~C*1701	0.09629	0.11545	0.07262		A*30:01~B*42:01~C*17:01	0.04664	0.06151	0.02749
	A*34:02~B*44:03	0.02505	0.04088	0.00581		A*34:02~C*04:01	0.0282	0.04229	0.01156		B*5802~C*0602	0.06782	0.06298	0.074		A*30:02~B*45:01~C*16:01	0.01757	0.02294	0.0085
	A*74:01~B*15:03	0.02018	0.01726	0.00581		A*02:01~C*16:01	0.02249	0.01786	0.02762		B*1503~C*0210	0.05897	0.05768	0.06074		A*29:02~B*42:01~C*17:01	0.01713	0.01126	0.02445
	A*30:02~B*45:01	0.01957	0.02594	0.00581		A*23:01~C*06:02	0.02228	0.03613	0.0058		B*5301~C*0401	0.05193	0.04324	0.06182		A*02:05~B*58:01~C*07:01	0.01556	0.02666	0.00143
	A*29:02~B*42:01	0.01928	0.01368	0.00581		A*02:05~C*07:01	0.01845	0.02821	0.00586		B*4501~C*1601	0.03956	0.04647	0.03013		A*02:01~B*45:01~C*16:01	0.01162	0.01294	0.00993
	A*02:05~B*58:01	0.01595	0.0264	0.00581		A*30:02~C*16:01	0.01824	0.02581	0.00829		B*4403~C*0401	0.0365	0.0613	0.00763		A*01:01~B*81:01~C*18:01	0.01161	0.0116	0.01119
	A*68:02~B*07:02	0.01595	0.01135	0.00581		A*74:01~C*02:10	0.01761	0.01651	0.0195		B*5801~C*0701	0.02719	0.04012	0.01054		A*30:02~B*18:01~C*07:04	0.01129	0.00928	0.01688
	A*66:01~B*58:02	0.01459	0.00837	0.00581		A*29:02~C*17:01	0.01742	0.00802	0.02656		B*1510~C*0304	0.02563	0.01856	0.03562		A*02:01~B*53:01~C*04:01	0.01078	0.01084	0.01382
	A*36:01~B*53:01	0.01376	0.0124	0.00581		A*02:01~C*04:01	0.01725	0.00774	0.02817		B*18:01~C*07:04	0.02431	0.01448	0.03688		A*02:01~B*15:03~C*02:10	0.00989	0.00437	0.01712
	A*02:01~B*45:01	0.01353	0.01407	0.00581		A*36:01~C*04:01	0.01527	0.01376	0.01411		B*07:02~C*07:02	0.02275	0.01991	0.02629		A*30:01~B*42:02~C*17:01	0.00888	0.01458
	A*68:02~B*15:10	0.01326	0.01056	0.00581		A*29:02~C*06:02	0.01412	0.01502	0.01173		B*45:01~C*06:02	0.02077	0.01898	0.02319		A*23:01~B*58:02~C*06:02	0.00885	0.0162
	A*30:02~B*18:01	0.01274	0.00824	0.00581		A*23:01~C*04:01	0.0138	0.01678	0.00919		B*08:01~C*07:01	0.01982	0.03252	0.00434		A*23:01~B*15:03~C*02:10	0.00883	0.01102	0.00699
	A*02:01~B*53:01	0.01245	0.01223	0.00581		A*30:02~C*07:01	0.01284	0.01363	0.00914		B*81:01~C*18:01	0.0198	0.01677	0.02341		A*23:01~B*45:01~C*06:02	0.00754	0.00996	0.00458
	A*02:01~B*15:03	0.01219	0.00682	0.00581		A*30:02~C*07:04	0.01232	0.01013	0.01618		B*14:02~C*08:02	0.01595	0.00928	0.0242		A*30:02~B*08:01~C*07:01	0.00736	0.01044
	A*01:01~B*81:01	0.01207	0.01465	0.00581		A*74:01~C*06:02	0.01179	0.00141	0.0227		B*49:01~C*07:01	0.01524	0.00366	0.02894		A*29:02~B*45:01~C*06:02	0.00657	0.00683	0.00641
	A*68:02~B*42:01	0.01006	0.01312	0.00581		A*01:01~C*18:01	0.01154	0.01194	0.01126		B*35:01~C*04:01	0.01442	0.01253	0.0173		A*02:02~B*58:02~C*06:02	0.00649	0.00118	0.01321
	A*23:01~B*58:02	0.00994	0.01799			A*23:01~C*02:10	0.01152	0.01375	0.00782		B*15:10~C*04:01	0.01409	0.02387			A*23:01~B*08:01~C*07:01	0.00634	0.00752	0.00286
	A*23:01~B*45:01	0.00937	0.01229	0.00685		A*68:02~C*07:02	0.01147	0.00841	0.01367		B*58:01~C*03:02	0.01328	0.01348	0.01427		A*23:01~B*44:03~C*04:01	0.00603	0.01006
	A*23:01~B*44:03	0.00935	0.01383	0.00196		A*68:01~C*06:02	0.01111	0.01556	0.00531		B*44:03~C*07:01	0.01309	0.01965	0.00724		A*02:01~B*51:01~C*16:01	0.00584	0.00155	0.01105
	A*29:02~B*45:01	0.00902	0.00784	0.01164		A*68:02~C*08:02	0.01089	0.01551	0.00462		B*81:01~C*04:01	0.01238	0.01308	0.01142		A*03:01~B*49:01~C*07:01	0.00555	0.00158	0.00977
	A*23:01~B*15:03	0.00875	0.00769	0.00715		A*03:01~C*06:02	0.01085	0.00894	0.01246		B*57:03~C*07:01	0.01208	0.00921	0.0137		A*02:01~B*58:02~C*06:02	0.00531	0.00372	0.0076
	A*30:01~B*42:02	0.00865	0.01432			A*02:01~C*02:10	0.01067	0.00575	0.01731		B*42:02~C*17:01	0.01064	0.01438	0.00608		A*30:02~B*57:02~C*18:01	0.00512		0.01286
	A*23:01~B*15:10	0.00853	0.01137	0.00547		A*74:01~C*04:01	0.01067	0.00981	0.01322		B*41:01~C*17:01	0.00953	0.01078	0.00738		A*30:01~B*42:01~C*17:11	0.00501	0.00731	0.00286
	A*30:02~B*08:01	0.00833	0.0141			A*23:01~C*07:01	0.01041	0.00935	0.01174		B*14:01~C*08:04	0.00933	0.01701
	A*74:01~B*58:02	0.00824	0.00275	0.01419		A*68:02~C*17:01	0.0104	0.01074	0.00852		B*58:01~C*06:02	0.00871	0.01055	0.00642
	A*33:01~B*42:01	0.00802	0.01352	0.00148		A*30:01~C*07:01	0.01039	0.00469	0.01419		B*42:01~C*17:11	0.00851	0.01078	0.00593
	A*30:02~B*57:03	0.00798	0.00614	0.01002		A*66:01~C*06:02	0.00985	0.00549	0.01707		B*53:01~C*06:02	0.00829	0.00651	0.01121
	A*68:02~B*14:02	0.00795	0.00812	0.00741		A*68:02~C*03:04	0.0094	0.00633	0.01286		B*57:02~C*18:01	0.00806	0.00116	0.01717
	A*23:01~B*58:01	0.00752	0.00959	0.00257		A*33:01~C*17:01	0.00939	0.01342	0.00376		B*51:01~C*16:01	0.0076	0.00481	0.01148
	A*43:01~B*15:10	0.00724	0.01487			A*03:01~C*70:1	0.00933	0.00396	0.01965		B*13:02~C*06:02	0.00757	0.00871	0.00616
	A*23:01~B*53:01	0.00687	0.0057	0.00574		A*30:02~C*18:01	0.00923	0.00489	0.01772		B*18:01~C*02:02	0.00697	0.01086	0.00161
	A*30:01~B*57:03	0.00678	0.0029	0.01059		A*23:01~C*07:02	0.00894	0.01384	0.00302		B*58:02~C*06:89	0.00689	0.00957	0.00324
	A*02:01~B*58:02	0.00671	0.00431	0.00816		A*68:02~C*04:01	0.00803	0.00397	0.01731		B*81:01~C*08:04	0.0067	0.0024	0.01217
	A*23:01~B*08:01	0.00671	0.00708	0.00633		A*43:01~C*04:01	0.00762	0.01309			B*15:03~C*02:27	0.00643	0.00139	0.00726
	A*02:02~B*58:02	0.00665	0.0012	0.01349		A*02:02~C*07:01	0.0072	0.00934	0.00376		B*57:03~C*18:01	0.00621	0.00696	0.00495
	A*68:01~B*58:02	0.00663	0.01055			A*32:01~C*08:04	0.0067	0.00807	0.00497		B*15:10~C*08:04	0.00594	0.01039
	A*68:02~B*53:01	0.00656	0.00125	0.01404		A*33:03~C*04:01	0.00659	0.00869	0.00443		B*15:10~C*16:01	0.00575	0.00481	0.00734
	A*02:01~B*51:01	0.00631	0.00148	0.01206		A*03:01~C*17:01	0.00655	0.00772	0.00187		B*39:10~C*12:03	0.00542	0.00166	0.00942
	A*03:01~B*49:01	0.00619	0.00179	0.01076		A*29:02~C*02:10	0.00594	0.00691	0.00299		B*47:03~C*07:01	0.0053		0.01158
	A*29:02~B*44:03	0.006	0.00975			A*30:01~C*17:11	0.0058	0.00737	0.00444
	A*03:01~B*15:10	0.0058	0.00452	0.00643		A*80:01~C*02:02	0.00576	0.0089
	A*30:02~B*57:02	0.00552		0.01381		A*68:02~C*07:01	0.00575	0.00633	0.00517
	A*23:01~B*70:02	0.00551	0.00702	0.00343		A*29:02~C*04:01	0.00562	0.00607	0.00573
	A*74:01~B*35:01	0.00539	0.00257	0.00944		A*02:02~C*06:02	0.00552	0	0.01307
	A*03:01~B*58:02	0.00536	0.00776	0.00369		A*30:01~C*03:04	0.00547	0.00326	0.00785
	A*74:01~B*58:01	0.00532	0.00254	0.00762		A*34:02~C*02:10	0.00544	0.00864	0.00151
	A*30:01~B*15:03	0.00513	0.01067			A*30:02~C*17:01	0.00542	0.00852	0.00343
	A*33:03~B*53:01	0.00505	0.00745			A*02:01~C*06:02	0.00526	0.00598	0.00585
	A*34:02~B*15:03	0.00504	0.00714	0.00151		A*02:05~C*08:04	0.00521	0.00897
	A*30:02~B*14:02	0.00502		0.00975		A*02:01~C*07:01	0.00511	0.00785
						A*02:05~C*04:01	0.00511	0.00596	0.00148
						A*30:01~C*02:10	0.00502	0.00885	0.00213
	Note: Only HLA haplotypes occuring at frequncy of 0.5% in the overall population are shown
				0.00148
				0.00297
				0.00148
				0.00148
				0.00148
			0
			0
				0.00151
				0.00301
			0
				0.00152
				0.00174
			0.00127
				0.00152
				0.00143
			0.00032
			0.00035
			0.00034
				0.00168
			0.00122
			0.00138
				0.00151
			0.00116
				0.00152
				0.00143
				0.00143
				0.00143
				0.00151
				0.00357
			0.00121
				0.00679
			0.00126
				0.00153
			0.00118
			0.00119
			0.00119
				0.00156
				0.00153
				0.00153
			0.00126
			0.00191
				0.00154
				0.00498
				0.00151
				0.00143
				0
			0.00142
			0.0012
			0.00118
			0.00116
				0.00166
				0.00143
				0.00157
			0.00116
				0.00151
				0.00143
				0
				0
				0
				0
				0.0016
				0.00143
				0.00143
			0.00121
				0.00143
			0.00127
			0.00171
			0.00121
				0.00143
				0.00143
			0.00116
				0.00143
			0.00116
			0.0012
			0.00124
				0.00315
				0.00156
				0.00143
