# Supplementary material for: Exome Sequencing Reveals a Putative Role for HLA-C*03:02 in Control of HIV-1 in African Pediatric Populations
Source: Front Genet. 2021 Aug 26;12:720213. doi: 10.3389/fgene.2021.720213 (PMC8428176; doi:10.3389/fgene.2021.720213)
Supplement: Supplementary file 10 [file Table_9.XLSX]

## Sheet: Table S9
	Table S9. LD associations between class I HLA loci
	Haplotypes		Frequency	Dʹ	R2	p-value
	A0101	C1801	0.0231	0.42	0.12	1.4855e-12
	A0101	B8101	0.0195	0.37	0.11	1.744e-09
	A0201	C1601	0.0402	0.25	0.05	6.9171e-09
	A0205	B5801	0.028	0.39	0.11	5.9257e-12
	A0205	C0701	0.0353	0.4	0.05	4.0785e-08
	A0214	B1803	0.0037	0.6	0.36	2.1644e-06
	A2902	B4201	0.0426	0.25	0.03	2.2376e-06
	A3001	C1701	0.1011	0.48	0.19	2.4965e-24
	A3001	B4201	0.095	0.44	0.19	3.0866e-24
	A3001	B4202	0.0158	0.74	0.05	2.7291e-07
	A3002	C0704	0.0244	0.37	0.04	9.8458e-07
	A3002	C1601	0.0365	0.22	0.03	3.1495e-06
	A3201	C0804	0.0122	0.28	0.07	1.6601e-07
	A3402	B4403	0.0426	0.55	0.21	2.6533e-20
	A3402	C0401	0.0499	0.53	0.07	7.5619e-10
	A3601	B5301	0.028	0.58	0.12	4.7346e-14
	A3601	C0401	0.0305	0.56	0.04	1.5704e-07
	A6601	B5802	0.0268	0.51	0.09	5.9441e-10
	A6802	B0702	0.0317	0.42	0.08	1.4467e-10
	A6802	C0702	0.0231	0.31	0.04	1.4522e-06
	A7401	C0210	0.0317	0.26	0.05	5.1895e-07
	A7401	B1503	0.0341	0.33	0.07	6.0028e-07
	A8001	C0202	0.0085	0.87	0.41	8.3071e-12
	A8001	B1801	0.0085	0.77	0.09	2.2514e-07
	B0702	C0702	0.0402	0.69	0.44	3.3717e-33
	B0702	C0719	0.0061	1	0.09	1.1329e-06
	B0705	C0702	0.0085	0.87	0.13	9.9029e-09
	B0801	C0701	0.0378	0.55	0.08	1.2291e-11
	B1401	C0804	0.0171	0.57	0.22	8.86e-15
	B1402	C0802	0.0292	0.92	0.48	4.7421e-31
	B1503	C0210	0.0938	0.78	0.53	2.2165e-58
	B1510	C0304	0.0463	0.71	0.33	2.0461e-30
	B1516	C1402	0.0085	1	0.58	1.6289e-14
	B1516	C1412	0.0037	1	0.25	2.394e-06
	B1517	C0501	0.0073	0.75	0.41	3.0651e-11
	B1801	C0704	0.0438	0.85	0.54	3.7263e-40
	B1801	C0202	0.0122	0.65	0.11	9.8733e-09
	B3501	C0401	0.0256	0.76	0.06	9.5962e-09
	B3910	C1203	0.0085	0.87	0.43	1.0497e-12
	B4201	C1701	0.1608	0.86	0.65	1.502e-88
	B4201	C0602	0.0134			3.3462e-07
	B4201	C1711	0.0158	0.67	0.04	9.669e-07
	B4202	C1701	0.0183	0.93	0.07	4.317e-09
	B4403	C0401	0.0646	0.49	0.09	1.1811e-12
	B4415	C0407	0.0085	1	0.78	7.404e-16
	B4501	C1601	0.0658	0.63	0.34	5.3424e-35
	B4901	C0701	0.028	0.91	0.11	3.3916e-15
	B5101	C1601	0.0134	0.84	0.1	5.9727e-10
	B5301	C0401	0.0938	0.73	0.21	1.9981e-31
	B5702	C1801	0.0134	1	0.18	1.7691e-12
	B5801	C0302	0.0244	0.75	0.18	5.6518e-18
	B5801	C0701	0.0536	0.46	0.09	1.7749e-16
	B5802	C0602	0.1096	0.79	0.38	2.6185e-46
	B5802	C0689	0.0122	0.69	0.06	1.6044e-06
	B8101	C1801	0.0341	0.48	0.22	3.5326e-19
	B8202	C0302	0.0061	1	0.2	1.2578e-07
	Number of distinct two-way tests performed = N2 = 15681.
	p-value for two-way comparisons = 0.05/N2 = 3.189e-06 for a 95% confidence level.
	Displaying results with p-values less than 3.189e-06
