# Supplementary material for: Exome Sequencing Reveals a Putative Role for HLA-C*03:02 in Control of HIV-1 in African Pediatric Populations
Source: Front Genet. 2021 Aug 26;12:720213. doi: 10.3389/fgene.2021.720213 (PMC8428176; doi:10.3389/fgene.2021.720213)
Supplement: Supplementary file 11 [file Table_10.XLSX]

## Sheet: Table S10 
	Table S10 HLA alleles associated with LTNP by Country of Origin
	HLA Allele		Allele frequency in cohort			P value	OR (95% CI)	P value†
			LTNPs	RPs	Total
	Protective
		Uganda
		A*34:02	0.0355	0.0102	0.0247	0.037	3.93 (1.09–14.17)	0.1665
		A*74:01	0.099	0.0476	0.077	0.0351	2.01 (1.05–3.85)	0.1665
		B*57:03	0.044	0.007	0.0283	0.0171	6.14 (1.38–27.29)	0.1812
		B*58:01	0.0415	0.035	0.0387	0.3097	1.53 (0.67–3.45)	0.6814
		B*81:01	0.0596	0.028	0.0461	0.0392	2.47 (1.04–5.82)	0.1812
		C*03:02	0.0323	0.0068	0.021	0.0162	6.52 (1.41–30.10)	0.065
		C*08:02	0.0484	0.0304	0.0404	0.3719	1.46 (0.64–3.35)	0.7438
		C*18:01	0.0753	0.0203	0.0509	0.0099	3.37 (1.34–8.48)	0.0539
		Botswana
		A*30:04	0.0143	0.01	0.0118	0.6018	1.40 (0.40–4.92)	0.935
		A*34:02	0.0629	0.06	0.0612	0.8911	1.04 (0.60–1.81)	0.935
		A*36:01	0.0257	0.022	0.0235	0.734	1.17 (0.48–2.89)	0.935
		A*74:01	0.04	0.036	0.0376	0.7811	1.10 (0.56–2.18)	0.935
		B*57:03	0.0318	0.0145	0.0217	0.1081	2.15 (0.85–5.45)	0.4107
		B*58:01	0.0925	0.0415	0.0628	0.0044	2.18 (1.28–3.72)	0.0417
		C*03:02	0.023	0.0061	0.0131	0.0472	3.89 (1.02–14.89)	0.378
		C*08:02	0.0345	0.0122	0.0214	0.0311	3.01 (1.10–8.19)	0.378
	Susceptible
		Uganda
		A*26:12	0.0025	0.0238	0.0116	0.0416	0.11 (0.01–0.92)	0.1665
		A*30:04	0.0025	0.0204	0.0102	0.0328	0.09 (0.01–0.83)	0.1665
		A*36:01	0.0127	0.0408	0.0247	0.029	0.30 (0.10–0.88)	0.1665
		A*43:01
		B*18:01	0.0337	0.0769	0.0521	0.0377	0.49 (0.25–0.96)	0.1812
		B*15:10	0.0389	0.0594	0.0476	0.2002	0.63 (0.31–1.28)	0.533
		B*41:01	0.0078	0.035	0.0193	0.0112	0.18 (0.05–0.68)	0.1812
		B*42:01	0.0622	0.1049	0.0804	0.0412	0.54 (0.30–0.98)	0.1812
		C*07:04	0.0269	0.0608	0.0419	0.0101	0.33 (0.15–0.77)	0.0539
		C*16:01	0.0296	0.0878	0.0554	0.0053	0.35 (0.17–0.73)	0.0539
		Botswana
		A*26:12
		A*43:01	0.02	0.046	0.0353	0.0587	0.45 (0.19–1.03)	0.8227
		B*18:01	0.0289	0.0353	0.0326	0.5775	0.80 (0.35–1.78)	0.7726
		B*15:10	0.0347	0.0871	0.0652	0.0033	0.37 (0.19–0.72)	0.0417
		B*41:01	0.0087	0.0207	0.0157	0.2565	0.50 (0.16–1.65)	0.6093
		B*42:01	0.1301	0.139	0.1353	0.7873	0.95 (0.63–1.42)	0.8567
		B*81:01	0.0318	0.0353	0.0338	0.8116	0.91 (0.41–1.99)	0.8567
		C*07:04	0.0144	0.0203	0.0179	0.515	0.69 (0.23–2.07)	0.8107
		C*16:01	0.0632	0.0711	0.0679	0.6964	0.90 (0.53–1.52)	0.8567
		C*18:01	0.0259	0.0386	0.0333	0.315	0.66 (0.29–1.49)	0.8107
	Bold indicates alleles that satisfy FDR correction p < 0.05
	† FDR adjusted P value
	Number of participants in Uganda was 370 (208 LTNPs vs 162 RPs) while Botswana was 451 (190 LTNPs vs 261 RPs)
