# Supplementary material for: Exome Sequencing Reveals a Putative Role for HLA-C*03:02 in Control of HIV-1 in African Pediatric Populations
Source: Front Genet. 2021 Aug 26;12:720213. doi: 10.3389/fgene.2021.720213 (PMC8428176; doi:10.3389/fgene.2021.720213)
Supplement: Supplementary file 12 [file Table_11.XLSX]

## Sheet: Table S11 
	Table S11 Zygosity tests for HLA alleles associated with LTNP and RP
	Allele		Homozygosity		Heterozygosity		Zygosity
			OR	p value	OR	p value	OR	p value
	Protective
		A*74:01	1.46	1	0.55	0.0165	2.65	0.3464
		B*57:03	1.86	1	0.33	0.0043	5.51	0.2272
		B*58:01	0.77	1	0.54	0.0258	1.42	0.7141
		C*03:02	0.25	1	0.22	5.7 X 10-4	1.14	1
		C*08:02	0.14	0.3182	0.38	0.0042	0.38	1
	Susceptible
		A*43:01	3.9	0.3889	3.82	0.0024	1.02	1
		B*15:10	0.2	0.297	1.93	0.0082	0.1	0.0594
		B*41:01	4.11	0.3804	4.07	0.004	1.01	1
		C*16:01	0.64	0.7053	1.63	0.0549	0.39	0.2869
