# Supplementary material for: Exome Sequencing Reveals a Putative Role for HLA-C*03:02 in Control of HIV-1 in African Pediatric Populations
Source: Front Genet. 2021 Aug 26;12:720213. doi: 10.3389/fgene.2021.720213 (PMC8428176; doi:10.3389/fgene.2021.720213)
Supplement: Supplementary file 13 [file Table_12.XLSX]

## Sheet: Table S12 
	Table S12. Haplotype frequency and association with LTNP
		Haplotype Frequency in Cohort					Haplotype effect§
	HLA Haplotype*
		LTNP	RP		p value†		OR (95% CI)	p value†
	A*01:01~B*81:01	0.0116324	0.0121685		0.976269		0.97 (0.31–3.04)	0.845
	A*02:01~B*15:03	0.007756	0.0183616		0.145419		0.51 (0.15–1.73)	0.482
	A*02:01~B*45:01	0.0117801	0.0137127		0.956542		1.04 (0.35–3.11)	0.18
	A*02:01~B*53:01	0.0126266	0.0103872		0.584932		1.44 (0.42–4.90)	0.861
	A*02:05~B*5801	0.0207044	0.0128797		0.298277		1.52 (0.53–4.29)	0.358
	A*29:02~B*42:01	0.0125219	0.0308101		0.032151		0.43 (0.15–1.24)	0.02
	A*30:01~B*42:01	0.051449	0.0507428		0.754653		1
	A*30:02~B*18:01	0.0063234	0.020464		0.037201		0.35 (0.10–1.22)	0.028
	A*30:02~B*45:01	0.0163428	0.0228394		0.391875		0.75 (0.28–1.96)	0.394
	A*34:02~B*44:03	0.0298549	0.0210526		0.35539		1.42 (0.62–3.24)	0.39
	A*36:01~B*53:01	0.0082023	0.0196253		0.063554		0.41 (0.13–1.27)	0.042
	A*66:01~B*58:02	0.0177493	0.0103654		0.304603		1.63 (0.59–4.54)	0.823
	A*68:02~B*07:02	0.0096152	0.0098418		0.831019		0.89 (0.24–3.26)	0.435
	A*68:02~B*15:10	0.0130389	0.0124472		0.847369		0.88 (0.30–2.58)	0.383
	A*68:02~B*42:01	0.0161043	0.0159545		0.975913		0.98 (0.34–2.77)	0.769
	A*74:01~B*15:03	0.0220583	0.0186882		0.549297		1.33 (0.55–3.18)	0.912
	global p-val = 0.26515
	A*01:01~C*18:01	0.0123549	0.0110647		0.739121		1.10 (0.36–3.35)	0.931
	A*02:01~C*04:01	0.0245306	0.0079171		0.205508		1.89 (0.53–6.63)	0.597
	A*02:01~C*16:01	0.0170613	0.0279627		0.128568		0.56 (0.22–1.41)	0.089
	A*02:05~C*07:01	0.0241804	0.012696		0.112095		1.88 (0.70–5.03)	0.182
	A*23:01~C*02:10	0.0135971	0.0084477		0.490383		1.40 (0.46–4.23)	0.357
	A*23:01~C*04:01	0.0118946	0.0172503		0.262175		0.44 (0.12–1.61)	0.157
	A*23:01~C*06:02	0.0209561	0.0241545		0.680478		0.79 (0.33–1.92)	0.713
	A*29:02~C*06:02	0.0186394	0.0110142		0.318285		1.72 (0.54–5.43)	0.556
	A*29:02~C*17:01	0.0095856	0.0285109		0.0078276		0.26 (0.08–0.79)	0.003
	A*30:01~C*17:01	0.0563921	0.0551813		0.87926		1
	A*30:02~C*07:01	0.0078409	0.0097739		0.341591		0.66 (0.19–2.28)	0.708
	A*30:02~C*07:04	0.0076048	0.0170522		0.11897		0.43 (0.13–1.45)	0.059
	A*30:02~C*16:01	0.0176432	0.0197319		0.775229		0.97 (0.36–2.60)	0.92
	A*34:02~C*040:1	0.0294596	0.0259557		0.606359		1.20 (0.52–2.73)	0.609
	A*36:01~C*04:01	0.0117298	0.018104		0.396931		0.63 (0.21–1.84)	0.202
	A*68:01~C*06:02	0.0109979	0.0108615		0.945987		0.89 (0.27–2.87)	0.85
	A*68:02~C*07:02	0.0116433	0.012762		0.896996		1.05 (0.28–3.85)	0.635
	A*68:02~C*08:02	0.0141822	0.006381		0.154044		2.72 (0.76–9.68)	0.106
	A*74:01~C*02:10	0.021199	0.0148634		0.405421		1.35 (0.55–3.27)	0.835
	A*74:01~C*06:02	0.0178128	0.0056783		0.0260737		3.70 (0.66–20.77)	0.372
	global p-val = 0.15544
	B*07:02~C*07:02	0.0296796	0.0161457		0.0887133		2.14 (0.96–4.75)	0.154
	B*08:01~C*07:01	0.026202	0.0157895		0.229128		2.05 (0.86–4.90)	0.068
	B*14:02~C*08:02	0.0195462	0.0125313		0.265198		1.92 (0.77–4.74)	0.509
	B*15:03~C*02:10	0.0555615	0.0624215		0.594715		1.15 (0.66–2.00)	0.923
	B*15:10~C*03:04	0.0234944	0.0280184		0.532022		0.95 (0.45–1.99)	0.472
	B*15:10~C*04:01	0.0059754	0.021119		0.0122376		0.35 (0.11–1.16)	0.173
	B*18:01~C*07:04	0.0185828	0.0296199		0.156521		0.74 (0.31–1.72)	0.11
	B*35:01~C*04:01	0.0202926	0.0089466		0.0846294		3.12 (1.01–9.55)	0.076
	B*42:01~C*17:01	0.0843613	0.107801		0.112027		1
	B*42:02~C*17:01	0.0055799	0.01534		0.0607052		0.41 (0.11–1.50)	0.163
	B*44:03~C*04:01	0.0357105	0.0380252		0.878363		1.24 (0.64–2.39)	0.358
	B*44:03~C*07:01	0.0102789	0.0177351		0.337473		0.80 (0.27–2.37)	0.732
	B*45:01~C*06:02	0.0238571	0.0182288		0.465286		1.50 (0.64–3.50)	0.571
	B*45:01~C*16:01	0.0320607	0.0464597		0.154097		0.84 (0.44–1.60)	0.552
	B*49:01~C*07:01	0.0140109	0.0162907		0.723919		0.90 (0.33–2.43)	0.401
	B*53:01~C*04:01	0.0489526	0.0548672		0.580155		1.10 (0.60–2.01)	0.705
	B*57:03~C*07:01	0.0203256	0.0027416		0.0074058		5.40 (1.40–20.79)	0.025
	B*58:01~C*03:02	0.0218735	0.005187		0.0038926		4.88 (1.50–15.86)	0.011
	B*58:01~C*07:01	0.0328213	0.0219634		0.174162		1.65 (0.77–3.52)	0.106
	B*58:02~C*06:02	0.0691698	0.0668518		0.809055		1.28 (0.75–2.18)	0.633
	B*81:01~C*04:01	0.013171	0.0110872		0.658471		1.47 (0.48–4.47)	0.633
	B*81:01~C*18:01	0.020006	0.0187621		0.759369		1.44 (0.64–3.24)	0.573
	global p-val = 0.006047
	A*01:01~B*81:01~C*18:01	0.0120568	0.0112782		0.897587		0.99 (0.30–3.24)	0.819
	A*02:01~B*45:01~C*16:01	0.0085611	0.0143154		0.359062		0.68 (0.18–2.47)	0.346
	A*02:01~B*53:01~C*04:01	0.0146707	0.0090481		0.226787		2.04 (0.46–8.92)	0.553
	A*02:05~B*58:01~C*07:01	0.0184619	0.0125313		0.312713		1.46 (0.49–4.37)	0.378
	A*29:02~B*42:01~C*17:01	0.0091145	0.0270109		0.016284		0.36 (0.11–1.16)	0.022
	A*30:01~B*42:01~C*17:01	0.0473108	0.044901		0.967152		1
	A*30:02~B*18:01~C*07:04	0.0077914	0.015979		0.185173		0.47 (0.13–1.69)	0.1
	A*30:02~B*45:01~C*16:01	0.0166885	0.0189778		0.628859		0.82 (0.27–2.47)	0.729
	A*34:02~B*44:03~C*04:01	0.025012	0.0194932		0.535591		1.20 (0.47–3.05)	0.605
	A*36:01~B*53~01~C*04:01	0.0083207	0.0180366		0.105826		0.43 (0.12–1.48)	0.086
	A*66:01~B*58:02~C*06:02	0.0124321	0.0091379		0.619387		1.23 (0.36–4.21)	0.855
	A*68:02~B*07:02~C*07:02	0.009931	0.0109343		0.807373		0.87 (0.26–2.93)	0.713
	A*68:02~B*15:10~C*03:04	0.0121745	0.0108497		0.709686		1.13 (0.30–4.15)	0.438
	A*74:01~B*15:03~C*02:10	0.0183246	0.0127626		0.380879		1.44 (0.54–3.87)	0.81
	global p-val = 0.38837
	*Haplotypes with frequency >1% in the pooled population
	†The p value is based on the individual haplotype association with LTNP compared to RP
	§Odds ratios are adjusted for country and gender
